# Supplementary material for: Reinforcement biases subsequent perceptual decisions when confidence is low, a widespread behavioral phenomenon
Source: eLife journal article supplement (doi:10.7554/elife.49834), 2020-04-14
Supplement: supp [file elife-49834-supp-v2.zip]

Archive with 5 entries (5 files):
- elife_poa_e49834_Figure_2_figure_supplement_1.pdf
- elife_poa_e49834_Transparent_Reporting_File.docx
- elife_poa_e49834_Figure_3_figure_supplement_1.pdf
- elife_poa_e49834_Figure_1_figure_supplement_1.pdf
- elife_poa_e49834_Figure_9_figure_supplement_1.pdf
