# Supplementary figures and images for: Reinforcement biases subsequent perceptual decisions when confidence is low, a widespread behavioral phenomenon
Source: eLife journal article supplement (doi:10.7554/elife.49834), 2020-04-14

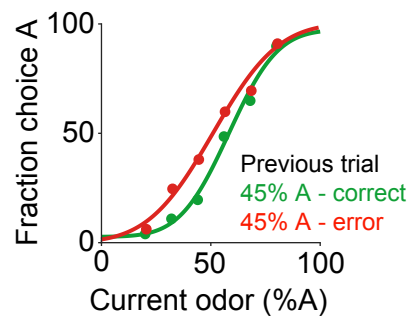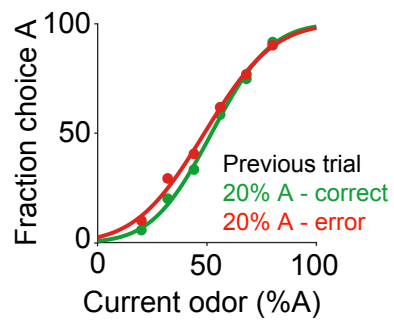

Supplement: supp [file elife-49834-supp-v1.zip]

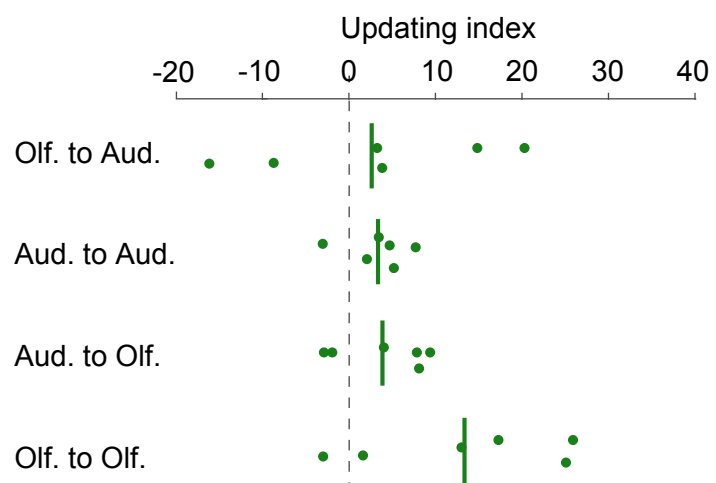

Supplement: supp [file elife-49834-supp-v1.zip]

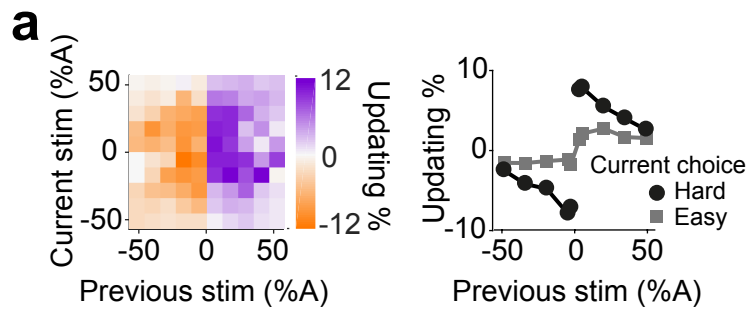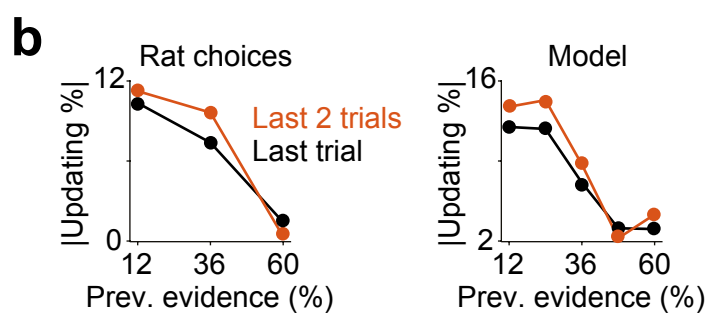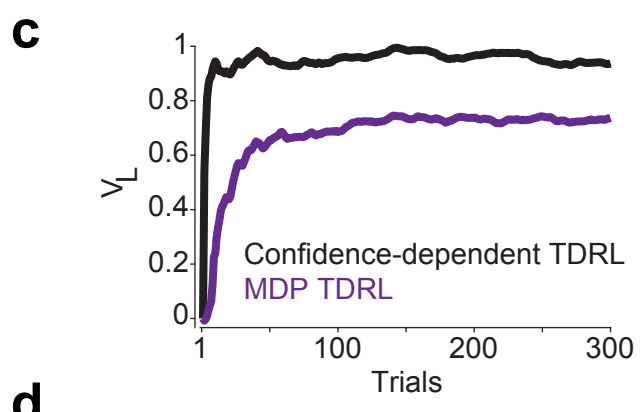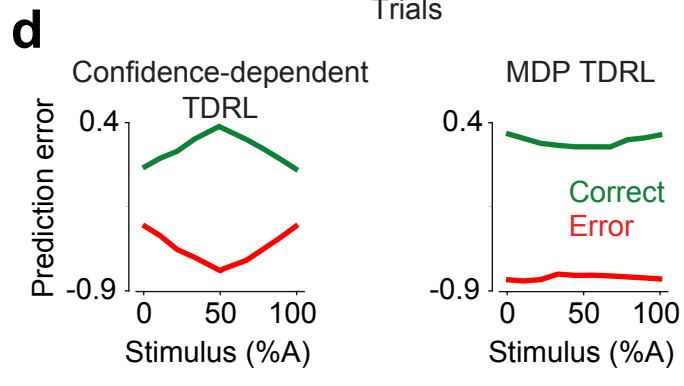

Supplement: supp [file elife-49834-supp-v1.zip]
